# Supplementary material
Source: ML conference proceedings conference paper supplement (https://openaccess.thecvf.com/content/CVPR2023/html/Christen_Learning_Human-to-Robot_Handovers_CVPR_2023_paper.html)
Supplement: Supplementary file 1 [file Christen_Learning_Human-to-Robot_Handovers_CVPR_2023_supplemental.zip]

Archive with 2 entries (2 files):
- handover_sim2real.mp4
- handover_sim2real_suppmat.pdf
